# Supplementary material for: Nestin- and Doublecortin-Positive Cells Reside in Adult Spinal Cord Meninges and Participate in Injury-Induced Parenchymal Reaction
Source: PubMed Central journal article supplement (PMC3468739; doi:10.1002/stem.766), 2011-10-28

# Neurospheres dissociation and limiting dilution

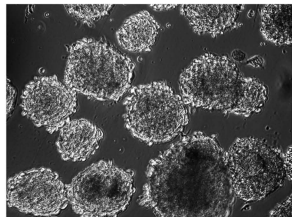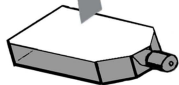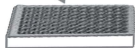

*single cell*      *single neurosphere*

#43D.14

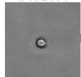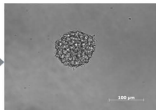

#29D.102

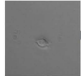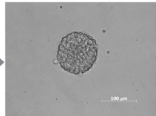

#71D.102

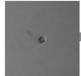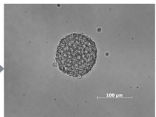

#06D.102

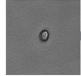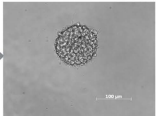

single clone expansion

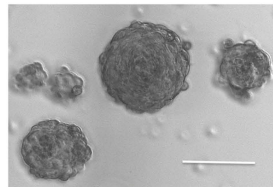

Differentiated cells derived from a single clone

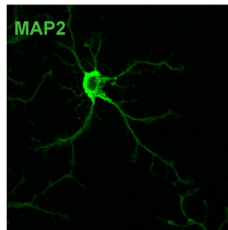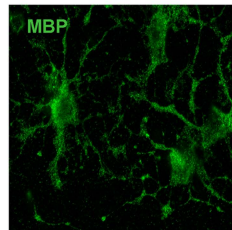

Supplement: stem0029-2062-SD2.pdf [file stem0029-2062-SD2.pdf]
