# Supplementary material for: Nestin- and Doublecortin-Positive Cells Reside in Adult Spinal Cord Meninges and Participate in Injury-Induced Parenchymal Reaction
Source: PubMed Central journal article supplement (PMC3468739; doi:10.1002/stem.766), 2011-10-28

**DCX/TO-PRO3****GFP/TO-PRO3****DCX/GFP/TO-PRO3****a**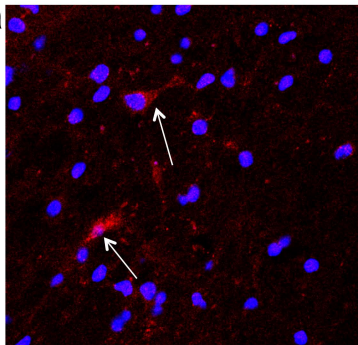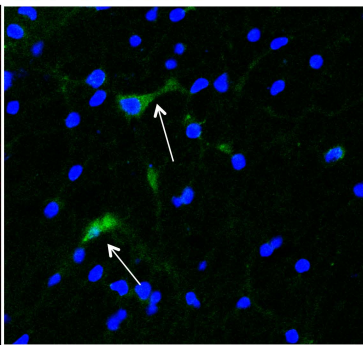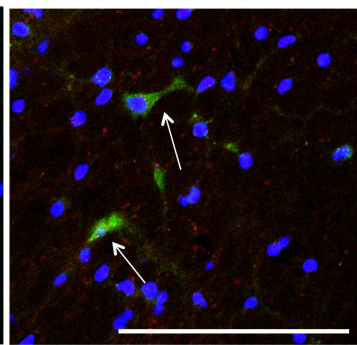**b**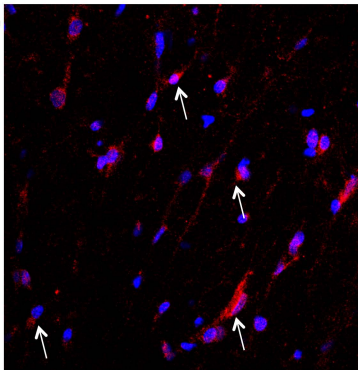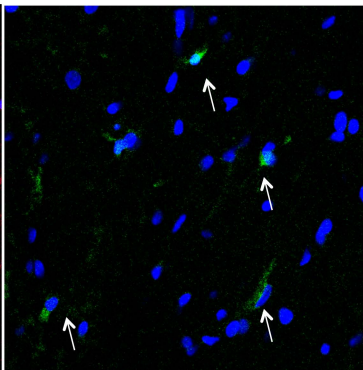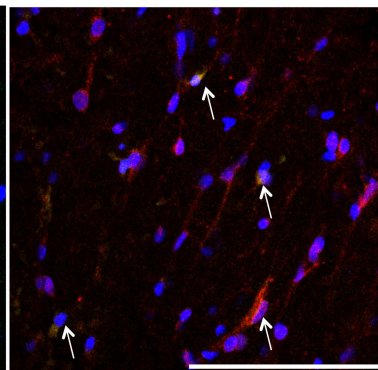

Supplement: stem0029-2062-SD9.pdf [file stem0029-2062-SD9.pdf]
